# Supplementary material for: Performance enhancements on wind turbines using flow controllers: A review
Source: Copernicus journal article supplement (doi:10.5194/wes-2024-63), 2024-07-01
Supplement: Supplementary file [file wes-2024-63-AC1-supplement.pdf]

Dear Referee,

We appreciate your comments and suggestions and have used them to improve the article.

Your comments for the article "Performance enhancements on wind turbines using flow controllers: A review" along with their responses are below:

In this drafted manuscript, the authors have performed a review study regarding the performance enhancements on wind turbines using flow controllers. After the detailed glance, the main issues for suggestion can be seen as the following comments:

- A chart of nomenclature, symbol, subscripts, abbreviations should be prepared in terms of better understanding for readers.

Response and action: According to your recommendation, the table has been added to the end of the article.

- The resolutions of few figures are not readable and too small. They must be reedited.

Response: Figures 6, 9, 10, 16, 23, and 24 are of average quality. They have been collected from different references and have been placed in this article with the same quality as in the original reference. The rest of the figures are of good quality.

- Provide comprehensive "Highlights" for the text, indicating the contributions of the paper, as allowed by the Journal.
- The writing of the drafted paper should be revised from top to bottom with an experienced helper.

Response and action: Parts of the paper are revised and changed. The other reviewer has sent us many comments with details, based on which we have changed the article a lot. In sections 2 and 3, paragraphs and sentences are rewritten and moved. Many sections are classified into several subsections.

In addition to comments mentioned above, it is not obligatory but the authors might be suggested to add the current and actual studies in the introduction part including explanation passive flow control methods over different airfoils as the following related and current studies so that the scope of this review study is wider:

- Traditional and new types of passive flow control techniques to pave the way for high maneuverability and low structural weight for UAVs and MAVs
- Investigation of pre-stall flow control on wind turbine blade airfoil using roughness element.

- Investigation of the effect of hidden vortex generator-flap integrated mechanism revealed in low velocities on wind turbine blade flow
- Passive Flow Control Application Using Single and Double Vortex Generator on S809 Wind Turbine Airfoil
- Effect of partial flexibility over both upper and lower surfaces to flow over wind turbine airfoil

The comments and suggestions mentioned above should be taken into consideration carefully for better review paper.

**Response:**

Our article is a review on the use of flow controllers in wind turbines, which is a wide topic. We have tried to consider important topics and focus on them. This focus led to deep analysis and maintaining a coherent structure throughout the paper. Adding suggested studies expands the topics of the article and reduces the depth of the concepts that were the main purpose of the article. We think the current topics are sufficient for the purpose of our review article.

Thank you for your feedback and comments, which are crucial for enhancing the quality of this article. Your time and attention are greatly appreciated.
